# Supplementary material for: Feedback control of the CXCR7/CXCL11 chemokine axis by estrogen receptor α in ovarian cancer
Source: PubMed Central journal article supplement (PMC6165996; doi:10.1002/1878-0261.12362), 2018-08-23
Supplement: MOL2-12-1689-s001.pdf [file MOL2-12-1689-s001.pdf]

**Fig. S1**

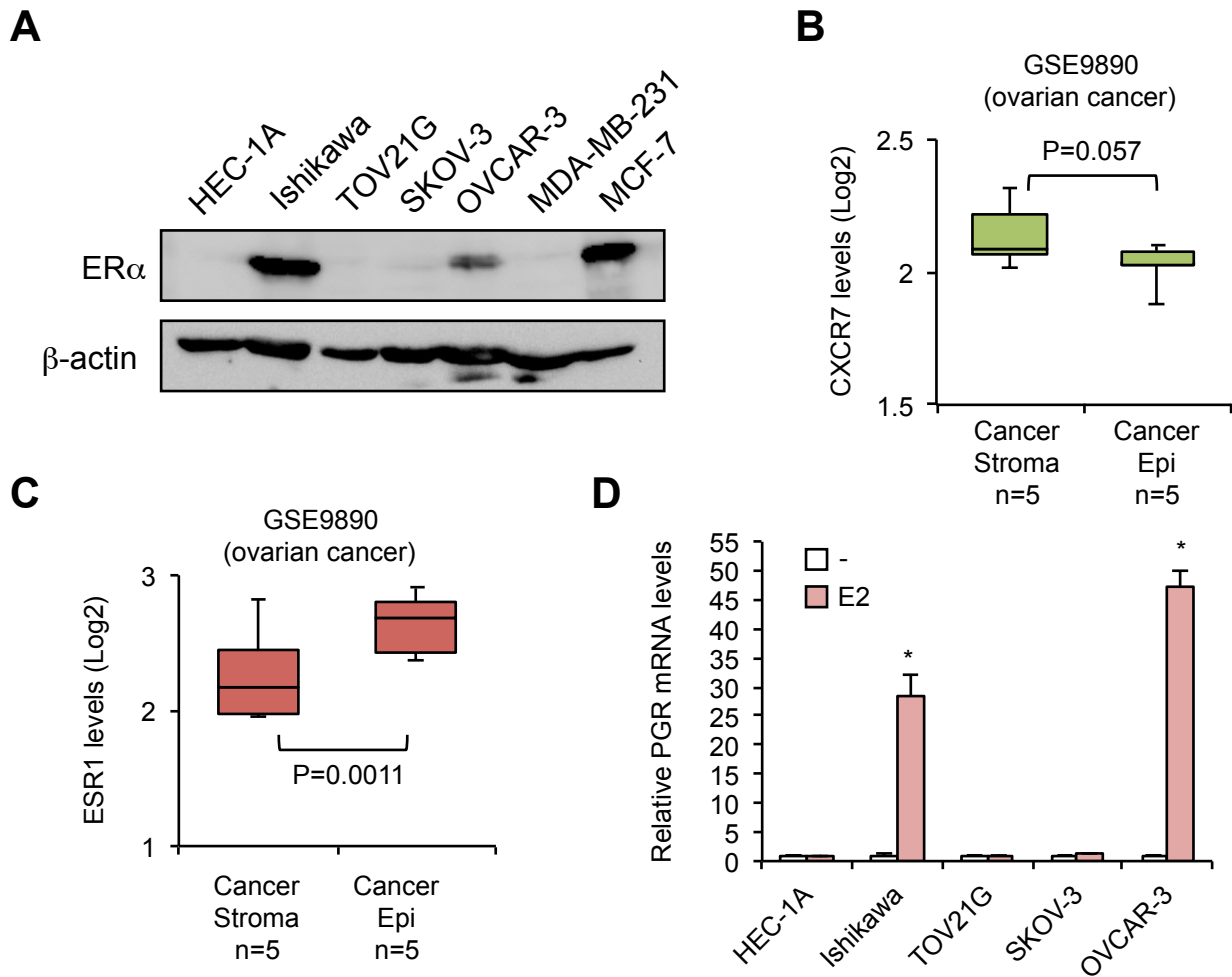

**Fig. S1. ER $\alpha$  and CXCR7 expression in reproductive cancer cells and tumors**

**A-** ER $\alpha$  protein levels in endometrial, ovarian and breast cancer cells determined by Western analysis. **B-** Boxplots of the expression levels of CXCR7 in the microdissected tumor stroma and epithelium of GSE9890 dataset. **C-** Boxplots of the expression levels of ESR1 in the GSE9890 dataset. **D-** qPCR analysis of progesterone receptor (PGR) gene expression in cells treated with 10nM estradiol (E2) for 16hrs. Results were normalized to RPLP0 expression. Values represent mean  $\pm$  SEM derived from three independent experiments performed in triplicate. Data were analyzed using Student's t-test. \*, P < 0.001 versus control vehicle-treated cells.

**Fig. S2**

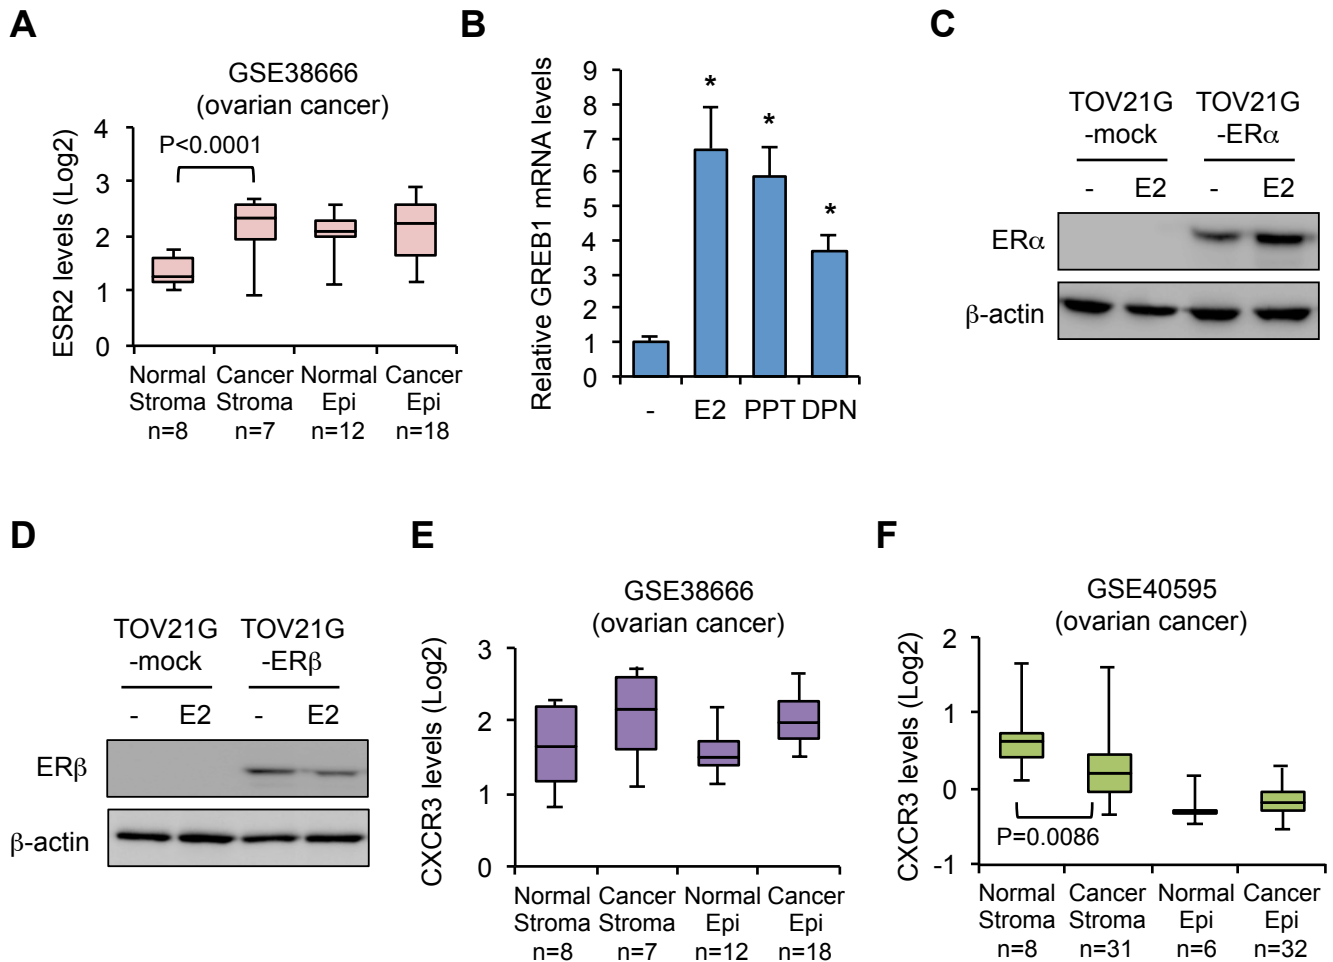

**Fig. S2. ER $\beta$  and CXCR3 expression in ovarian cancer cells and tumors**

**A-** Boxplots of the expression levels of ESR2 (ER $\beta$ ) in microdissected normal epithelium, normal stroma, tumor epithelium and tumor stroma included in the ovarian dataset GSE38666. **B-** OVCAR-3 cells were treated with 10 nM each of E2 or selective agonist for ER $\alpha$  (PPT) or ER $\beta$  (DPN) for 16 hrs. Cells were then analyzed for GREB1 expression by qPCR. Values represent fold response compared to vehicle-treated cells. Results were derived from three independent experiments performed in triplicate. Errors represent SEM. Data were analyzed using Student's t-test. \*,  $P < 0.005$  versus control vehicle-treated cells. **C-** ER-negative ovarian cancer TOV21G cells were stably transfected with human ER $\alpha$ . Validation of expression was performed by Western analysis of cells treated or not with 10nM E2 and compared to mock-transfected parental cells. **D-** Similar as in (C) except that TOV21G cells were stably transfected with ER $\beta$ . **E-** Boxplots of the expression levels of CXCR3 in the GSE38666 dataset. **F-** Boxplots of the expression levels of CXCR3 in the GSE40595 dataset.

**Fig. S3**

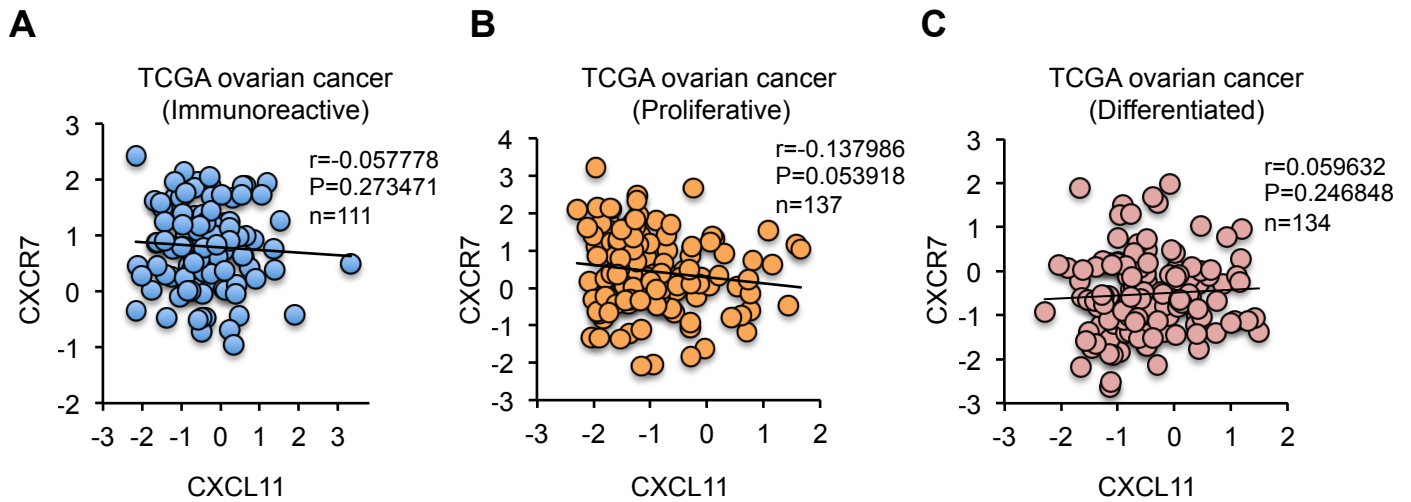

**Fig. S3. Correlation analysis of CXCR7 and CXCL11 in ovarian cancer subtypes.**

**A-C** Scatter plots of CXCR7 and CXCL11 expression levels in the immunoreactive (A), proliferative (B), and differentiated (C) molecular subtypes stratified from the ovarian TCGA dataset. Pearson correlation scores ( $r$ ) and  $P$  values are indicated for each.

**Fig. S4**

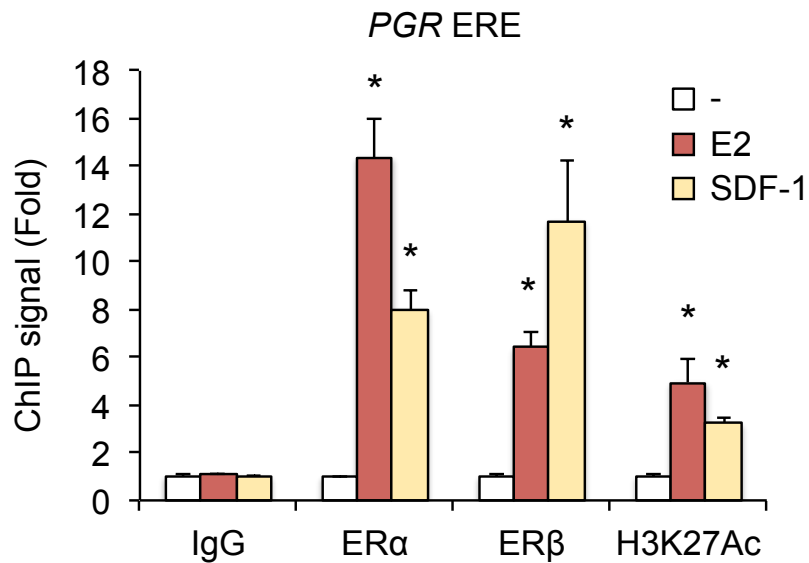

**Fig. S4. Enrichment of ER $\alpha$  at the ERE of the *PGR* gene**

OVCAR-3 cells were treated or not with 10nM E2 or 25nM SDF-1 for 45 min and harvested for ChIP-qPCR analysis using antibodies for ER $\alpha$ , ER $\beta$ , or active histone H3K27ac mark. Preimmune IgGs were used as a negative control. Values represent mean $\pm$ SEM derived from three independent ChIP experiments performed in duplicate. Data were analyzed using Student's t-test. \*, P < 0.01 versus control vehicle-treated cells.

**Fig. S5**

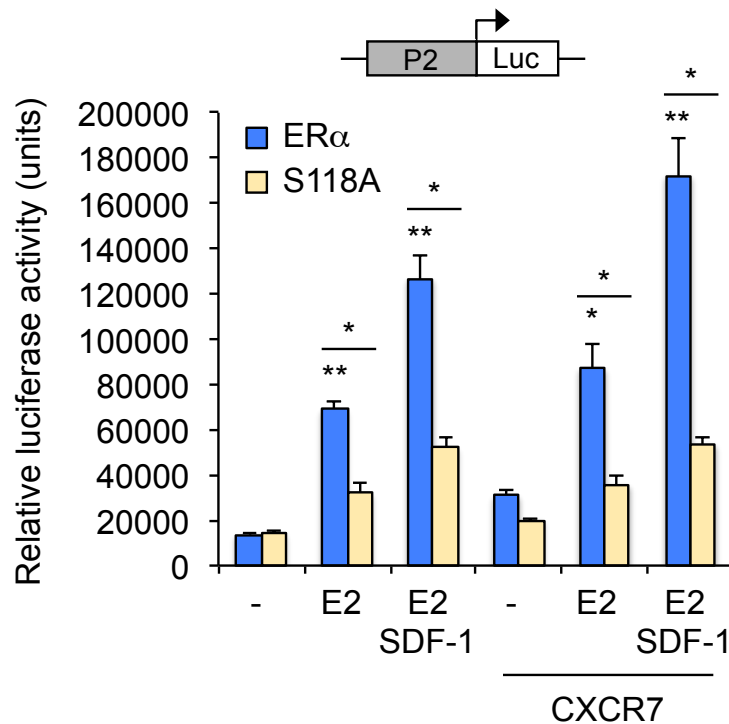

**Fig. S5. Maximal activation of ER $\alpha$  by the CXCR7/SDF-1 chemokine axis requires Ser-118**

293 cells were transfected with wild-type ER $\alpha$  or S118A mutant in the presence of a luciferase reporter gene under the control of CXCR7 P2 promoter (P2-Luc). Cells were also transfected with CXCR7 as indicated. Cells were then treated or not with 10nM E2 and 50nM SDF-1 for 16h. Luciferase values were normalized to  $\beta$ -galactosidase activity and expressed as relative response compared to vehicle-treated cells. Values represent mean $\pm$ SEM derived from at least three independent experiments performed in triplicate. Data were analyzed using Student's t-test. Significance was determined compared to respective untreated control cells, and between ER $\alpha$  and S118A-transfected cells. \*, P < 0.01; \*\*, P < 0.001

**Fig. S6**

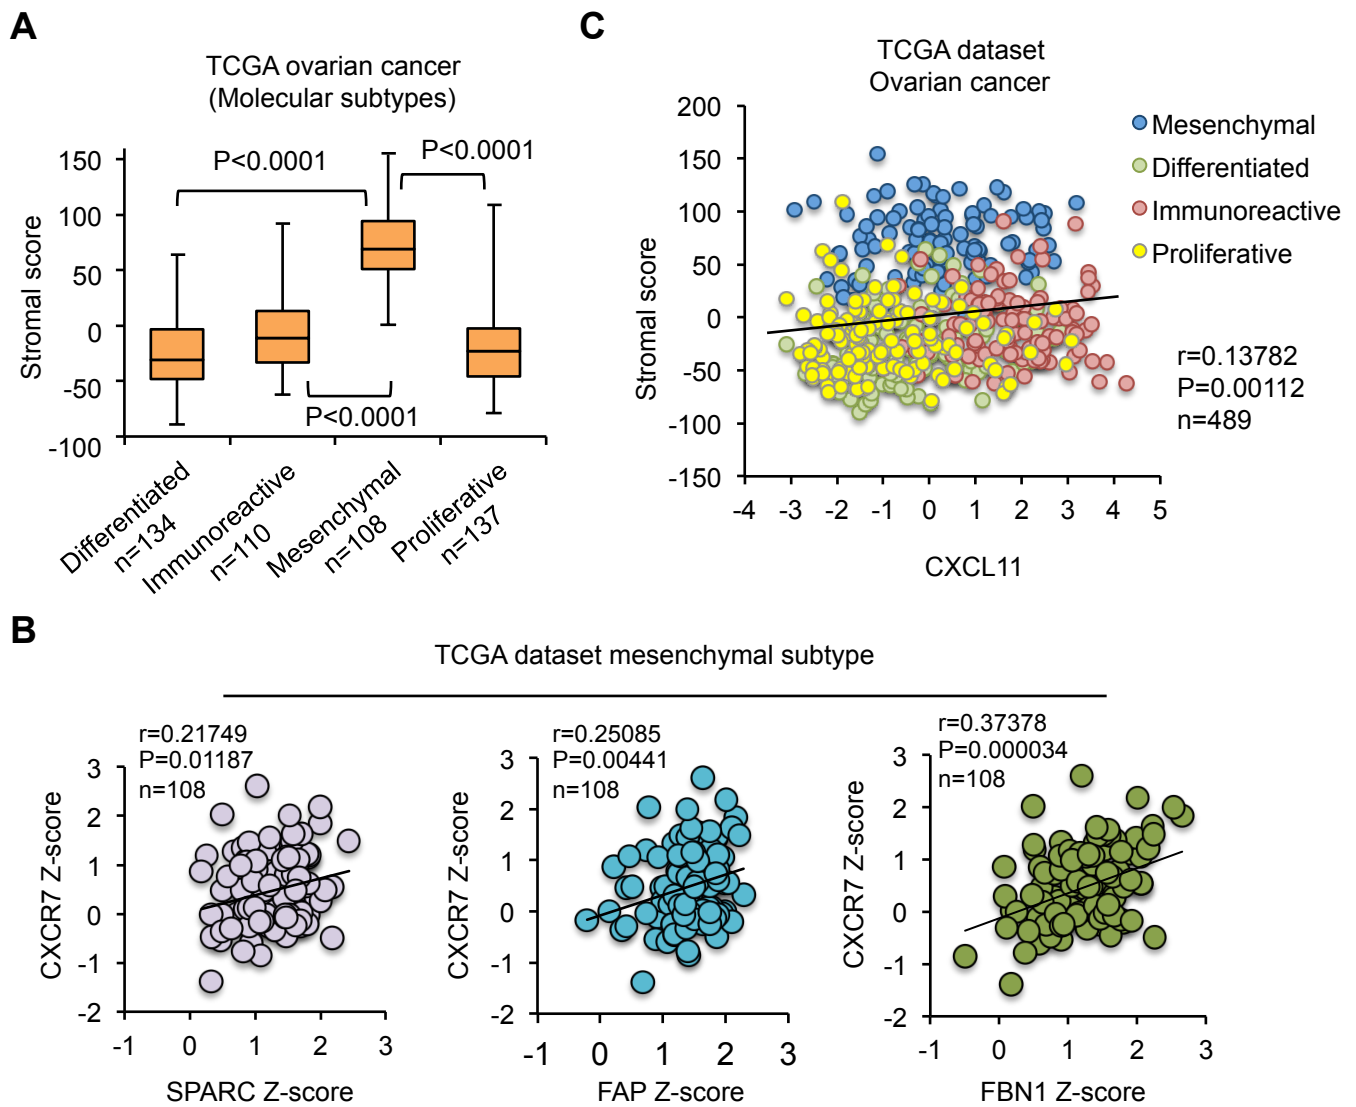

**Fig. S6. CXCR7 and CXCL11 expression is associated with OC stromal signature and markers.**

**A-** Boxplots from GSEA analysis of stromal signature score in the various molecular subtypes of the ovarian TCGA dataset. **B-** Scatter plots of CXCR7 expression relative to stromal markers in the mesenchymal subtypes of the ovarian TCGA dataset. **C-** Pearson correlation analysis of CXCL11 expression with the stromal signature in all four molecular subtypes of the TCGA dataset. Pearson correlation scores ( $r$ ) and  $P$  values are indicated for each.

**Fig. S7**

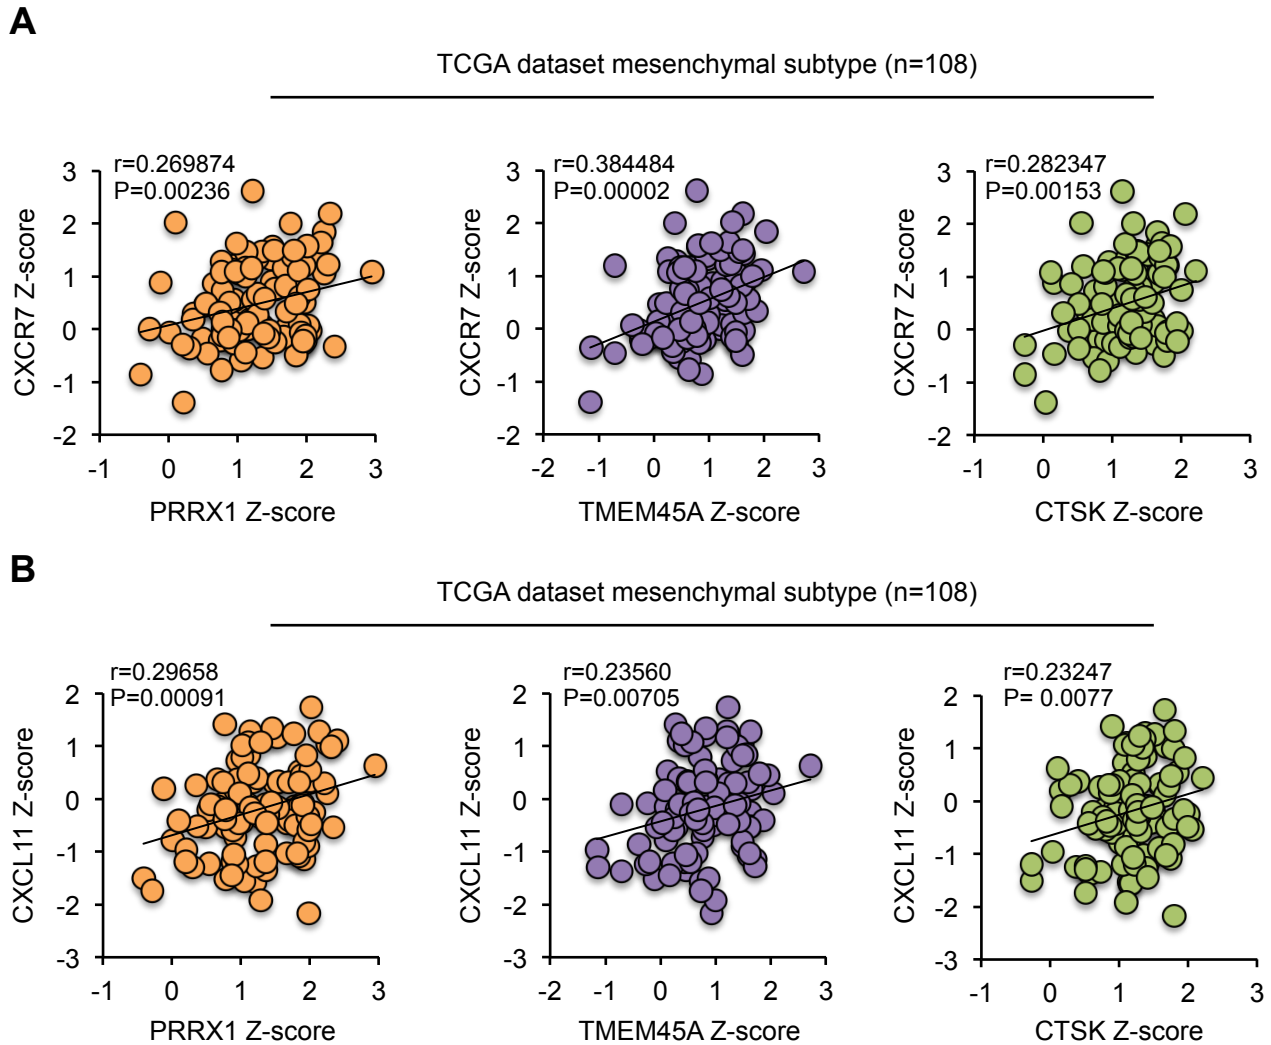

**Fig. S7. CXCR7 and CXCL11 expression correlates with ECM markers.**

**A-** Pearson correlation analysis of CXCR7 expression with markers of extracellular matrix (ECM) remodeling in the mesenchymal subtype of the ovarian TCGA dataset. **B-** Correlation analysis of CXCL11 expression performed as in (A). Pearson correlation scores (r) and P values are indicated for each.

**Fig. S8**

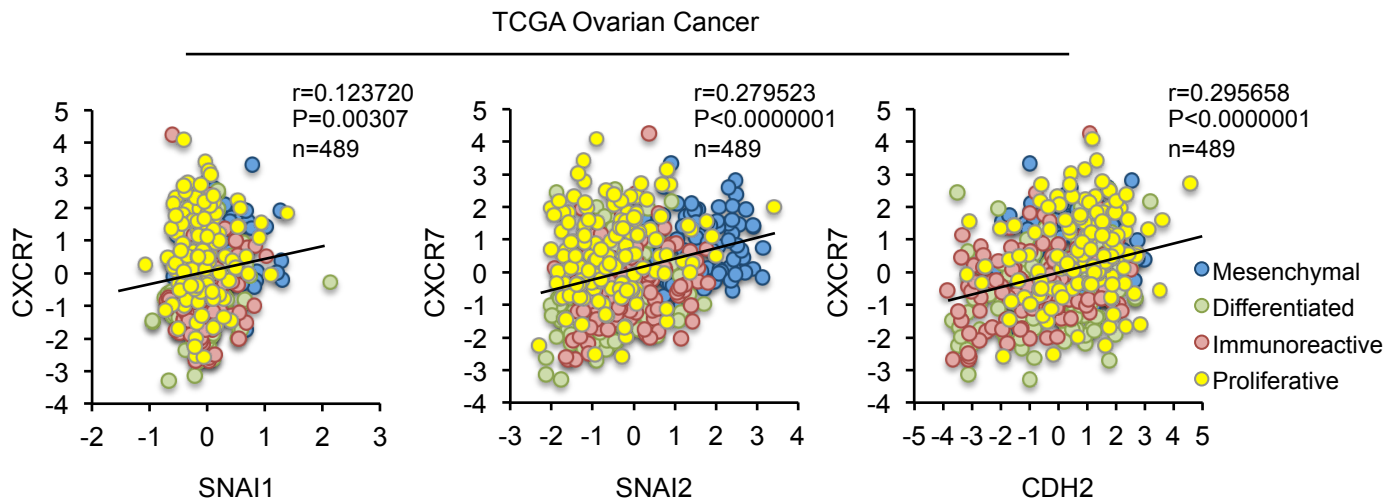

**Fig. S8. CXCR7 expression is associated with EMT indicators.**

**A-** Pearson correlation analysis of CXCR7 expression with markers of epithelial-mesenchymal transition (EMT) in the ovarian TCGA dataset. Each molecular subtypes are color-coded. Pearson correlation scores (r) and P values are indicated for each.
